# Supplementary material for: Secondary ozone peaks in the troposphere over the Himalayas
Source: Copernicus journal article supplement (doi:10.5194/acp-2016-908), 2016-11-02
Supplement: Supplementary file 1 [file acp-2016-908-supplement.pdf]

# Secondary Ozone Peaks in the troposphere over the Himalayas

N. Ojha (1), A. Pozzer (1), D. Akritidis (1, 2), J. Lelieveld (1, 3)

1 Atmospheric Chemistry Department, Max Planck Institute for Chemistry,  
Mainz, Germany

2 Department of Meteorology and Climatology, School of Geology, Aristotle  
University of Thessaloniki, Thessaloniki, Greece

3 Energy, Environment and Water Research Center, The Cyprus Institute, Nicosia,  
Cyprus

narendra.ojha@mpic.de

This document represents the electronic supplement of our article “Secondary Ozone Peaks over the central Himalayas” in Atmos. Chem. Phys. Disc. (2016), available at:  
<http://www.atmos-chem-phys-discuss.net>

Date: 08/30/2016

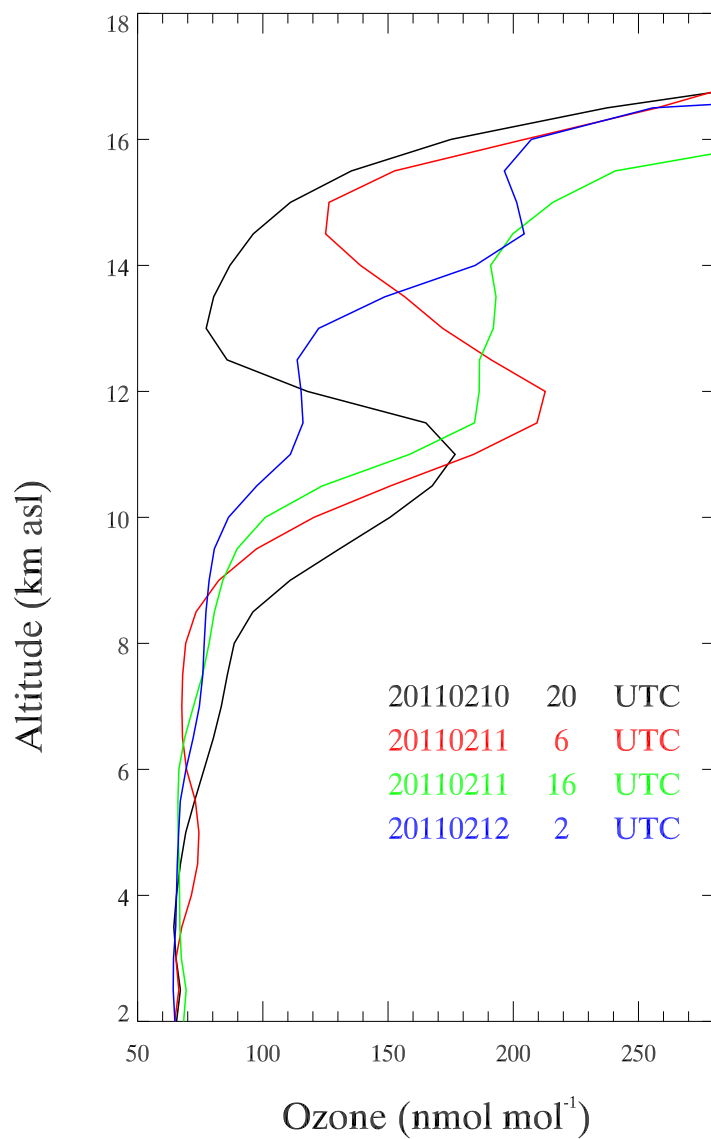

Figure 1: EMAC simulated time-evolution of ozone vertical profiles at each model time step during 10–12 Feb 2011.
