# Supplementary material for: Secondary ozone peaks in the troposphere over the Himalayas
Source: Copernicus journal article supplement (doi:10.5194/acp-2016-908), 2016-11-02
Supplement: Supplementary file [file acp-2016-908-AC1-supplement.zip]

# Secondary ozone peaks in the troposphere over the Himalayas

Narendra Ojha<sup>1</sup>, Andrea Pozzer<sup>1</sup>, Dimitris Akritidis<sup>1,2</sup>, and Jos Lelieveld<sup>1,3</sup>

<sup>1</sup>Atmospheric Chemistry Department, Max Planck Institute for Chemistry, Mainz, Germany

<sup>2</sup>Department of Meteorology and Climatology, School of Geology, Aristotle University of Thessaloniki, Thessaloniki, Greece

<sup>3</sup>Energy, Environment and Water Research Center, The Cyprus Institute, Nicosia, Cyprus

*Correspondence to:* Narendra Ojha (narendra.ojha@mpic.de)

**Abstract.** Layers with strongly enhanced ozone concentrations in the middle-upper troposphere, referred to as Secondary Ozone Peaks (SOPs), have been observed in different regions of the world. Here we use the global ECHAM5/MESSy atmospheric chemistry model (EMAC) to (i) investigate the processes causing SOPs, (ii) explore both their frequency of occurrence and seasonality, and (iii) assess their effects on the tropospheric ozone budget over the Himalayas. The vertical profiles of potential vorticity (PV) and a stratospheric ozone tracer (O<sub>3</sub>s) in EMAC simulations, in conjunction with the structure of SOPs, suggest that SOPs over the Himalayas are formed by Stratosphere-to-Troposphere Transport (STT) of ozone. The spatial distribution of O<sub>3</sub>s further shows that such effects are in general ~~confined to~~ most pronounced in the northern part of India. Model simulated ozone distributions and backward air trajectories show that ozone rich air masses, associated with STT, originate as far as northern Africa and the North Atlantic Ocean, the Middle-East, as well as nearby regions in Afghanistan and Pakistan, and are rapidly (within 2–3 days) transported to the Himalayas. Analysis of a 15-year (2000–2014) EMAC simulation shows that the frequency of SOPs is highest during the pre-monsoon season (e.g. 11% of the time in May), while no intense SOP events are found during the July–October period. The SOPs are estimated to enhance the Tropospheric Column Ozone (TCO) over the central Himalayas by up to ~~26~~21 %.

## 1 Introduction

Tropospheric ozone is a short-lived climate forcer (Shindell et al., 2012) and an air pollutant with adverse effects on human health and crop yields (Monks et al., 2015, and references therein). The effects of tropospheric ozone on crop yields and human health occur near the surface, whereas its radiative forcing is shown to be strongest in the middle-upper troposphere (e.g. Lacis et al., 1990;

Myhre et al., 2013; Monks et al., 2015). The processes controlling tropospheric ozone in the middle and upper troposphere can be different from those near the surface. The photochemistry involving non-methane volatile organic compounds (NMVOCs) and carbon monoxide, in the presence of nitrogen oxides (NO<sub>x</sub>) primarily controls ozone pollution in the planetary boundary layer. In contrast, dynamics involving Stratosphere-Troposphere Exchange (STE) play a key role in the middle-upper troposphere (e. g. Holton and Lelieveld, 1996; Lelieveld and Dentener, 2000; Neu et al., 2014; Ojha et al., 2014; Monks et al., 2015). Therefore, to quantify the relative contributions of photochemical and dynamical processes to the ozone budget and assess the climatic impacts of anthropogenic ozone, studies of the vertical distribution of ozone are essential.

Ozone observations have been conducted globally and locally using different instruments and platforms as reviewed recently by Tanimoto et al. (2015). Balloon-borne observations employing ozonesondes offer the advantage of measuring ozone across the tropopause. Analyses of ozonesonde observations have provided valuable information on the variability, general features and trends in ozone profiles (e.g. Logan, 1985, 1994). Secondary maxima in ozone profiles, called Secondary Ozone Peaks (SOPs), are a unique phenomenon in which anomalously large ozone concentrations are observed in confined layers in the middle-upper troposphere or lower stratosphere.

The occurrences of SOPs, underlying processes and their global distribution have been discussed in a limited number of studies (Dobson, 1973; Reid and Vaughan, 1991; Varotsos et al., 1994), reviewed by Lemoine (2004). SOPs have been commonly observed in high latitudes, for example, as laminated structures of ozone with the highest frequency of occurrence during the spring season (Dobson, 1973). These laminated structures are primarily considered to be a winter-spring phenomenon, with a peak altitude of occurrence near 14 km (Reid and Vaughan, 1991). Varotsos et al. (1994) suggested that the north and northwest atmospheric circulations in the lower stratosphere play a key role in the formation of SOPs observed over Athens, Greece. Overall, the occurrence of SOPs is typically considered to be a northern hemispheric phenomenon, with no SOPs reported in the tropics and the southern hemisphere (Lemoine, 2004). Trickl et al. (2011) showed the influences of ozone import from the stratosphere and transport along the subtropical jet stream over Europe. According to the aforementioned studies, SOPs are mainly attributed to dynamical processes involving STE, advection and Rossby wave breaking events.

Recent studies (Hwang et al., 2005, 2007; Park et al., 2012) focusing on the Korean region showed that SOP events regularly occur over mid-latitudes. In contrast to earlier studies ~~presenting that~~ demonstrated the occurrence of SOPs mostly in the lower stratosphere, several SOPs were observed in the upper troposphere over Korea. Hwang et al. (2005) attributed these SOPs to the downward transport of ozone from the stratosphere ~~within~~ on a timescale of about one day (24 h), typical of ~~the~~ cross-tropopause exchange. Furthermore, the frequency of occurrence, estimated from 9 years of ozonesonde observations, was found to have strong seasonal variability over Korea with a broad winter-spring maxima and frequencies of occurrence up to 50–80 % (Hwang et al., 2005). Moreover,

59 Hwang et al. (2005) reported an increase in SOP occurrences over Korea, while the STT effects are  
60 anticipated to increase tropospheric ozone in the future (Banerjee et al., 2016).

61 The studies pertaining to the influences of STT on the vertical profiles of ozone are relatively  
62 sparse over the tropical Indian region. Mandal et al. (1998) analyzed observations from ozonesondes  
63 and an MST Radar, and attributed the enhanced ozone mixing ratios in the upper troposphere to STT  
64 through the indistinct tropopause over southern India. Fadnavis et al. (2010) combined satellite-borne  
65 measurements (TES and MLS) with simulations performed by the MOZART model and showed sig-  
66 nificant influences of STT over India in particular during winter and spring /pre-monsoon seasons.  
67 Venkat Ratnam et al. (2016) used satellite observations to estimate the effect of STE associated  
68 with tropical cyclones over the north Indian Ocean. Most of the studies based on in situ measure-  
69 ments have however been confined over the southern part of India (e.g. Mandal et al., 1998; Sinha  
70 et al., 2016) and the adjacent marine regions (Lal et al., 2013). Ganguly and Tzanis (2011) used  
71 ozonesonde observations from three Indian stations operated by the Indian Meteorological Depart-  
72 ment (IMD) and suggested that overall STT only plays a minor role into the budget of tropospheric  
73 ozone over India. However, the influences of STT were found to increase with latitude /northward  
74 over India (Ganguly and Tzanis, 2011).

75 Studies investigating the SOP structures and implications have been few over the tropical Indian  
76 region, until very recently (Ojha et al., 2014; Das et al., 2016). The events over southern India were  
77 found to be mainly associated with stratospheric intrusions during tropical cyclonic storms (Das  
78 et al., 2016). In contrast, the SOP events observed over the central Himalayas in northern India  
79 appear similar to what is typically observed over the mid-high latitudes as mentioned earlier. More-  
80 over, SOPs were observed to be more frequent during spring, and were attributed to the combined  
81 effects of STE and advection (Ojha et al., 2014). In the previous work using weekly ozonesonde  
82 measurements (3–4 profiles per month), covering the period January 2011–December 2011 (Ojha  
83 et al., 2014), only 6 SOP events were observed, being insufficient to calculate the frequency and sea-  
84 sonality of SOP occurrences. Additionally, model simulations are required to both trace the source  
85 regions and quantify the effect of SOPs on the tropospheric ozone budget. Such ~~investigation is~~  
86 ~~of critical importance over central Himalayas, as satellite-based studies show~~ investigations are of  
87 key importance as the Indo-Gangetic Plain (IGP) and Himalaya region are global hotspot regions  
88 in terms of anthropogenic pressures that could impose threats to Asia's water and food security  
89 (Ramanathan et al., 2008). Satellite-based studies corroborate the high pollution loading over ~~the~~  
90 northern India and the nearby ~~Indo-Gangetic Plain (IGP)-IGP~~ including the Tropospheric Column  
91 Ozone (TCO) over South Asia (Fishman et al., 2003). The IGP is a regional hotspot of the so called  
92 "Atmospheric Brown Clouds (ABC)", consisting of brown haze formed by sub-micron size aerosol  
93 particles, emitted from a wide range of anthropogenic and natural sources. It has been shown that  
94 ABC reduce the amount of sunlight reaching the Earth's surface by as much as 10 to 15%, and  
95 enhance atmospheric solar heating by as much as 50% (Ramanathan et al., 2007).

In the present study, the global atmospheric chemistry climate model EMAC (ECHAM5/MESSy Atmospheric Chemistry) has been used to explore the processes causing the SOPs, investigate the frequency and seasonality of their occurrence and finally assess their impact on the tropospheric ozone budget over the central Himalayas.

## 2 Methodology

### 2.1 EMAC

The ECHAM5/MESSy Atmospheric Chemistry (EMAC) is a numerical system for the simulation of regional and global air quality and climate (Jöckel et al., 2010). In this work the model results from simulation RC1SD-base-10a of the ESCiMo project (Jöckel et al., 2016) are used. The general circulation model ECHAM5 version 5.3.02 (Roeckner et al., 2006) and the Modular Earth Submodel System (MESSy) version 2.51 (Jöckel et al., 2016) were used at T42L90MA-resolution, implying a spherical truncation of T42 (corresponding to a quadratic Gaussian grid of approx. 2.8 by 2.8 degrees in latitude and longitude) and 90 vertical hybrid pressure levels up to 0.01 hPa. The dynamics of the general circulation model were weakly nudged by Newtonian relaxation towards ERA-Interim reanalysis data (Dee et al., 2011). Gas-phase and particulate trace species calculated with the EMAC model have been extensively evaluated in previous studies (e.g. Pozzer et al., 2007, 2010, 2012). Simulation RC1SD-base-10a [with model output every 10h](#), was selected between the ESCiMo simulations as suggested in Jöckel et al. (2016) (“For intercomparison with observations, we recommend to use the results of [...] RC1SD-base-10a.”). Detailed information on the model set-up and comparison with observations can be found in Jöckel et al. (2016).

A tracer of stratospheric ozone, denoted as  $O_{3s}$  in EMAC, has been used to quantify the effects of STT.  $O_{3s}$  follows the transport and destruction processes of ozone in the troposphere but not its chemical formation (Roelofs and Lelieveld, 1997) and it is initialized to  $O_3$  in the stratosphere.

### 2.2 Tropopause height and tropopause folds

The Lapse Rate Tropopause (LRT) height is calculated from EMAC output using the WMO definition as the altitude at which lapse rate decreases to a value of 2 °C/km or less, provided that the average lapse rate between this level and all higher levels within the adjacent 2 km do not exceed 2 °C/km.

Tropopause folds in EMAC simulations were identified with an algorithm developed by Sprenger et al. (2003), and improved by Škerlak et al. (2014), using the three dimensional fields of potential vorticity, potential temperature and specific humidity. The vertical extent of the folds, as determined by the difference between the upper and middle tropopause crossings (see Fig. 1 in Tyrllis et al. (2014)) has been further used to identify shallow, medium and deep folds, as described and used elsewhere (Tyrllis et al., 2014; Škerlak et al., 2015; Akritidis et al., 2016).



### 2.3 Observational dataset

The occurrence of SOPs was reported using ozonesonde observations from Nainital (79.45° E, 29.37° N, 1958 m asl), a high altitude station located in the central Himalayan region (Ojha et al., 2014) (Fig. 1; (Ojha et al., 2014)). These data have been used to evaluate the capability of EMAC to reproduce SOPs over this region. A typical event ~~Some typical events~~ of SOP occurrence ~~at Nainital observed on 10<sup>th</sup> March 2011 is shown over Nainital can be seen~~ in Fig. ??a2. The ozone mixing ratios in the middle-troposphere (10–11 km) are clearly observed to be very high (150–250 nmol mol<sup>-1</sup>) forming an SOP. The location of Nainital station and the geographical topography of the northern Indian region are also shown in Fig. ??b1.

Ozone profiles at Nainital were measured using Electrochemical Concentration Cell (ECC) ozonesondes. The method utilizes the titration of ozone in potassium iodide solution, which leads to production of Iodine (I<sub>2</sub>). The conversion of I<sub>2</sub> to I<sup>-</sup> in the cell leads to the flow of two electrons for each ozone molecule entered. The measured cell current, flow rate of air along with sensor parameters, e.g. the background current and pump temperature, are used to derive ozone mixing ratios (Ojha et al., 2014). The precision and accuracy of ECC-ozonesondes are reported to be ±(3–5)% and ±(5–10)% respectively, up to 30 km altitude (Smit et al., 2007).

The yearlong observations analyzed previously (Ojha et al., 2014) showed six occurrences of elevated ozone layers in the 10–12 km altitude range, identified as SOPs. For the analysis of frequency of occurrence and impacts of SOPs, we classify an ozone profile as SOP, if 1) O<sub>3</sub> mixing ratios at 10–12 km, are higher by at least by 50% compared to average ozone in the lower troposphere and 2) O<sub>3</sub> mixing ratios are again lower (at least by 20%) above the SOP (as shown in Fig. 2 and described in more detail in the section 3.3).

Further details of the Nainital station and meteorology (Sarangi et al., 2014; Singh et al., 2016) and balloon-borne measurements (Smit et al., 2007; Ojha et al., 2014; Naja et al., 2016) can be found elsewhere.

### 2.4 Backward trajectories

We used the Hybrid Single Particle Lagrangian Integrated Trajectory (HYSPLIT) model (<http://ready.arl.noaa.gov/HYSPLIT.php>) to investigate the source regions and the transport patterns causing SOPs over the central Himalayas. ~~Backward-5-day backward~~ trajectories have been simulated at 10, 11 and 12 km above sea level (asl) (Fig. S4 in the supplement), which are the typical altitudes ~~where SOPs are observed in this study~~ for the 6 SOP events shown in Fig. 2. ~~Additional trajectories have been computed for each model timestep in the month of May 2002 (Fig. 6), during which the model predicts the highest frequency of occurrence in the 2000–2014 period.~~ HYSPLIT trajectory simulations are driven by NCEP reanalysis meteorological fields and the model vertical velocity option has been used for the vertical motions. More details of the backward trajectory simulations

165 using the HYSPLIT model (Draxler and Hess, 1997, 1998; Draxler et al., 2014) and use of various  
166 datasets as meteorological inputs over the Indian region can be found elsewhere (e.g. Ojha et al.,  
167 2012; Kumar et al., 2015).

## 168 3 Results and Discussion

### 169 3.1 Model Evaluation

170 Fig. 2 shows the comparison of EMAC simulated ozone profiles with ozonesonde measurements  
171 over Nainital during six SOP events reported previously (Ojha et al., 2014). Model ozone fields have  
172 been bilinearly interpolated to the observation site and model output closer to the time of observation  
173 is weighted higher (Ojha et al., 2016). As the vertical resolution of EMAC simulations is about 500–  
174 600 m in the middle troposphere (10–12 km), where SOPs are typically observed, the observational  
175 values are also shown at similar vertical resolution for comparison. The average ozone mixing ratios  
176 along with the corresponding standard deviations for the six events are compared between model  
177 and observations in Table 1 for lower, middle and upper tropospheric altitudes.

178 The EMAC model is found capable of reproducing the altitudinal placement of the SOPs over the  
179 central Himalayas during all six events. For example, on 20<sup>th</sup> Apr and 9<sup>th</sup> May the model shows the  
180 peak ozone mixing ratios at 10.5 km asl, in agreement with the ozonesonde profiles. On other events,  
181 such as on 11<sup>th</sup> Feb, 10<sup>th</sup> Mar and 25<sup>th</sup> Oct, the altitude of SOP differs slightly (by 0.5-1 km) between  
182 model and ozonesonde profiles, except on 7<sup>th</sup> Jun (by 2 km). The aforementioned discrepancies in  
183 the altitude of SOPs occurrence might be related to the model vertical resolution.

184 In addition to the altitude of SOPs occurrence, EMAC also quantitatively captures the ozone  
185 enhancements. The model bias in simulating peak ozone mixing ratios is found to be varying from  
186 about  $-45 \text{ nmol mol}^{-1}$   $-26\%$  (7<sup>th</sup> Jun) to  $+34 \text{ nmol mol}^{-1}$   $21\%$  (9<sup>th</sup> May). The biases are found to be  
187 within the variability of 1 standard deviation in 10–12 km altitude ( $28\text{--}59 \text{ nmol mol}^{-1}$ ) as calculated  
188 from ozonesonde observations during spring over this site (See Table 1 and Ojha et al. (2014)).

189 However, the model generally overestimates the ozone mixing ratios in the lower troposphere by  
190 about  $11\text{--}24 \text{ nmol mol}^{-1}$  (Table 1) and shows some limitation in capturing less pronounced SOPs,  
191 typically observed outside the winter-spring seasons. The bias in the absolute ozone enhancement  
192 ( $-45 \text{ nmol mol}^{-1}$ ) as well as in the altitudinal placement of the SOP (by 2 km) are higher on 7<sup>th</sup> Jun.  
193 ~~However, these events were~~ Here EMAC simulations are evaluated for all events identified visually  
194 (Ojha et al., 2014) ~~and here we show all for completeness~~. The SOP events ~~will be~~ are selected based  
195 on specific criteria in order to calculate the frequency of occurrence, as discussed in detail in Sect.  
196 3.3.

197 Possible biases between model and observations could arise from a variety of sources, most im-  
198 portantly, the time-evolution of the SOPs (Supplementary material - Figure [+S1](#)). Therefore, the  
199 limited number of ozone profile measurements could lead to a temporal difference in the state of

SOP evolution being compared between model and observation. We tried to minimize this effect by applying a weighted average algorithm, as mentioned above.

Overall, ~~because the model is able to reproduce the occurrences~~ found to be able of reproducing the occurrence of SOPs, their altitudinal placements and the ozone enhancements over the central Himalayas. Additionally, EMAC simulated average ozone distribution appears to compare well with the ozonesonde climatology over Delhi (77.16°E, 28.49°N) in north India (Fig. S2) and with aircraft-based measurements from the IAGOS-CARIBIC program (Jöckel et al., 2016). Hence, we use the EMAC simulations to investigate the underlying processes (Section 3.2), the frequency of occurrences (Section 3.3) and the effects on tropospheric ozone budget (Section 3.4).

### 3.2 Origin of SOPs

In this section, we analyze the EMAC simulated meteorological and chemical fields in conjunction with backward air trajectories to investigate the origin of SOPs over the central Himalayas. Fig. 3 shows the vertical profiles of potential vorticity (PV), a tracer of stratospheric intrusions, during the SOP events observed over Nainital. PV vertical profiles during all SOPs show layers of high values coinciding with the altitude of SOPs.

The enhanced PV layers are found to be weaker during June and October ~~as~~ compared to events during late winter and spring. PV values are found to be between 3.1 PVU (20<sup>th</sup> Apr) to 4.7 PVU (11<sup>th</sup> Feb) at the SOP altitudes for the events occurring in winter-spring. Even during the less pronounced events of early-summer and autumn, the PV values at SOP altitude are 1.8–2.5 PVU. ~~The PV values at the SOP altitudes~~ Further, the average vertical profile of PV during SOPs, derived from a long-term model simulation (2000–2014), shows similar structure (Supplementary material- Fig. S3), as shown here for the individual events. Average PV values during SOPs are found to be significantly higher (e. g.  $3.0 \pm 1.3$  PVU in winter,  $1.8 \pm 0.5$  PVU during summer monsoon) compared to timesteps without SOP ( $0.3 \pm 0.2 - 1.5 \pm 1.3$  PVU) (Supplementary material- Table S1). Such enhanced PV values during the SOPs suggest that the air masses showing very high ozone levels (SOPs) are of stratospheric origin.

To quantify the amount of ozone transported from the stratosphere during the SOPs, we compare the EMAC simulated vertical profiles of  $O_3$  with  $O_{3s}$  during observed 6 SOP events (Fig. 4). ~~The model shows~~  $O_{3s}$  values are very similar to  $O_3$  indicating that nearly all excess ozone at the SOP altitudes is of the excess ozone that constitutes SOPs is of the stratospheric origin, during the winter and spring, despite of the fact that the SOPs are below the LRT, except on 10<sup>th</sup> Mar, 7<sup>th</sup> Jun and 25<sup>th</sup> Oct. The contribution of tropospheric photochemical sources to the SOPs, as represented by the difference  $O_3 - O_{3s}$ , is found to be significant on 25<sup>th</sup> Oct ( $15 \text{ nmol mol}^{-1}$ ) and much larger on 7<sup>th</sup> Jun ( $50 \text{ nmol mol}^{-1}$ ).

The comparison of  $O_3$  with  $O_{3s}$  is further analyzed for the extended period 2000–2014 and a seasonal climatology is derived by aggregating all SOP events into four different seasons (Fig. 5).

The average amount of ozone transported from the stratosphere to the SOPs is found to be the highest during spring ( $162.5 \pm 40 \text{ nmol mol}^{-1}$ ), followed by winter ( $149.4 \pm 35 \text{ nmol mol}^{-1}$ ). In contrast the contribution of tropospheric photochemical sources to the SOPs is highest during the summer monsoon ( $30 \text{ nmol mol}^{-1}$ ). The stronger anthropogenic contribution up to (and beyond) the SOP altitudes during the summer monsoon could be a combined effect of deep convective mixing towards the onset of the summer monsoon and weak horizontal winds (Ojha et al., 2014; Naja et al., 2016) leading to the accumulation of the photochemically processed air masses of tropospheric origin.

Since the LRT over this region is located significantly higher (Fig. 4, also see Naja et al. (2016)) than the altitude of SOPs, and that the ozone in SOPs is found to be of stratospheric origin, we conclude that stratospheric air masses are sandwiched between tropospheric layers at 10–11 km altitude. This result complements previous studies primarily showing the altitudinal placement of SOPs at about 14 km near the Lower Stratosphere (UTLS) (e.g. Reid and Vaughan, 1991; Hwang et al., 2007).

~~The contribution of tropospheric photochemical sources to the SOPs can be represented by the difference-s, which is found to be large (about  $50 \text{ nmol mol}^{-1}$ ), near SOP altitude on 7<sup>th</sup> Jun. This could be a combined effect of deep convective mixing towards the onset of the summer monsoon and weak horizontal winds (Ojha et al., 2014; Naja et al., 2016) leading to the accumulation of the photochemically processed air masses of tropospheric origin.~~

In order to investigate the underlying dynamics that transport the stratospheric air masses, leading to the SOPs over the Himalayas, we analyzed the backward air trajectories (Fig. ?? Supplementary material-Fig. S4), initialized over Nainital at 10, 11 and 12 km, which are the typical altitudes of the SOPs (Fig. 2). The air mass trajectories indicate rapid transport from the west, for example on 11<sup>th</sup> Feb, taking only two days for the air masses to be transported across Africa and Middle-East and reach the Himalayas (Fig. ??). Further, the locations of the tropopause folds occurred during the period of air trajectories are also shown. The tropopause folds are mostly found in a belt between about 20 and 35°N, in agreement with previous studies (Škerlak et al., 2015). The air masses have been encountering extensive tropopause dynamics along the path of transport, before reaching the Himalayas.

~~EMAC simulated~~ Additionally, air mass trajectories were computed for each model timestep during May 2002 in which the frequency of SOPs was found to be the highest during the 2000–2014 period. Fig. 6 shows the EMAC simulated evolution of  $\text{O}_3$  vertical profiles along with-s along these trajectories classified into SOPs and No SOPs above Nainital. The evolution of  $\text{O}_3$  and PV along the trajectories are shown in the supplementary material (Fig. S7 and S8). Air masses are enriched / accumulate the ozone of stratospheric origin during transport to Nainital causing SOPs. A significant fraction of trajectories during non SOP timesteps originates over the south west having lower  $\text{O}_3$ s ( $< 90 \text{ nmol mol}^{-1}$ ). The trajectories which do get higher contributions of stratospheric ozone are found to be diluted during transport, making the enhancements above Nainital too small to be an SOP.

273 The vertical distribution of EMAC simulated  $O_3s/O_3$  ratio along the 5-day backward air trajec-  
 274 ries are shown in Fig. 7. The pressure variations of the air masses and tropopause along the trajectory  
 275 are also shown. In agreement with the analysis of PV and , there is no apparent downward transport  
 276 of airmass, as typically observed in altitude variations of the backward trajectories during many  
 277 STT events (e.g. Ma et al., 2014; Sarangi et al., 2014). Strong The  $O_3s/O_3$  ratio is mostly found to  
 278 be close to unity ( $>0.9$ ) near the altitude (pressure) of air mass trajectory during transport, except on  
 279 7<sup>th</sup> Jun and 25<sup>th</sup> Oct (0.5–0.8). The intrusions enriching tropospheric air masses with stratospheric  $O_3$   
 280 are clearly visible. More specifically, a significant stratospheric contribution to tropospheric ozone is  
 281 found in the upper/middle troposphere during the 5-day period before the event, with the associated  
 282 PV values ( $< 2$  pvu) indicating mixing of stratospheric air into the troposphere. Additionally, strong  
 283 variability in the altitude of the LRT along the path of the transport is seen, except for the event of  
 284 7<sup>th</sup> Jun. This variability in LRT The dramatic variability in the LRT along the trajectory (e.g. from  
 285 100 to 200 hPa on 11<sup>th</sup> Feb) appears to be associated with the tropopause folds as shown in Fig.  
 286 ??folding activity (Fig. S4 and S5). Several shallow tropopause folds are seen (vertical extent of 50  
 287 to 200 hPa) occur along the transport path, while deeper folds (medium medium folds (vertical extent  
 288 of 200–350 hPa) are only seen found during 11<sup>th</sup> Feb and 9<sup>th</sup> May (also see Škerlak et al. (2015)).  
 289 Intrusion of a significant amount of  $O_3$  due to tropopause folds over the Eastern Mediterranean and  
 290 the Middle-East was shown by Akritidis et al. (2016). The combination of very strong winds asso-  
 291 ciated with the subtropical jets (Fig. ??S4, (Ojha et al., 2014; Naja et al., 2016)) and this intense  
 292 tropopause dynamics, enriching the troposphere with stratospheric ozone, leads to the formation of  
 293 SOPs over the Himalayas. Transport of stratospheric air during the analysis period is not found on  
 294 7<sup>th</sup> Jun (Fig. 7), which explains the smaller ozone enhancement in this event, probably related to the  
 295 presence of some residual influences from previous days (Fig. ?? and 7).

296 The transport of ozone rich air masses from the stratosphere towards the Himalayas can be seen  
 297 more clearly in the longitude-pressure cross sections at 30°N (Fig. 8), and latitude-pressure cross  
 298 sections at 80°E (Fig. 9) for all the events and the day before. Fig. 8 reveals three geographical re-  
 299 gions viz. Northern Africa and Atlantic Ocean (lon  $< 40^\circ E$ ), Middle-East (40°E–60°E) and northern  
 300 South Asia (60°E–100°E), where the intrusions of stratospheric air masses can be identified. Blobs  
 301 of air masses characterized by high PV values ( $> 2$  PVU) are also seen. Additionally, Fig. 9 shows  
 302 ~~a strong disparity in the stratospheric influences at 80°E, with effects of STT mostly confined at~~  
 303 ~~latitudes higher than 25°N, and minimal over the that stratospheric influences are more pronounced~~  
 304 over the northern parts of the Indian subcontinent compared to Southern India. This result based on  
 305 EMAC simulations is found to be in agreement with the study by Ganguly and Tzanis (2011) based  
 306 on ozonesonde observations at three Indian stations.

307 To investigate the possible mixing of the transported stratospheric air with tropospheric air in  
 308 the vicinity of the SOPs, the Turbulence-Index (TI) is derived from EMAC fields, as described in  
 309 Ellrod and Knapp (1992). To detect the Clear Air Turbulence (CAT) areas and potential mixing,

the approach similar to Traub and Lelieveld (2003) has been followed. The pressure-longitude cross sections of  $O_3$ s (color filled) and TI (contour lines) at  $29.5^\circ N$  near the SOPs pressure height (400–100 hPa) are shown in the Fig. 10 for the timesteps of events and a timestep before and after the event. The enhanced TI values during the SOP events above Nainital indicate higher probability of mixing between stratospheric and tropospheric air, supporting the irreversible nature of the associated STT.

### 3.3 Frequency of SOPs

The frequency of SOP occurrences was not estimated over Nainital from observations, due to the availability of only 3–4 profiles in each month, however a tendency of higher frequency during spring was noticed (3 events), as compared to other seasons (1 event per season) (Ojha et al., 2014). In this section, we use long-term EMAC simulations, conducted for a period of 15 years (2000–2014), to investigate the frequency of SOP occurrence and seasonality over the central Himalayas. Due to the variability in the SOP altitude as well as the absolute enhancements during the SOPs, general / unique criteria can not be defined. Therefore, we first select the ozone profiles in which Average Ozone Mixing Ratios (AOMR) at 10–12 km, a typical altitude of SOP occurrence, are significantly higher (at least by 50%) compared to average ozone in the lower troposphere. Additionally, to explicitly select only the profiles which are SOPs (and not a direct intrusion over the Himalayas) the additional criterion was applied that directly above the SOP the ozone mixing ratios are again lower (at least by 20%), so that selected profiles have a shape typical of SOPs, as shown in Fig. 2. These two conditions can be mathematically expressed as

$$AOMR_{10-12km} \geq 1.5 \times AOMR_{0-6km}$$

and

$$AOMR_{12-14km} \leq 0.8 \times AOMR_{10-12km}$$

Further, the factors 1.5 and 0.8 representing an enhancement by 50% and reduction by 20% were suitably varied, which confirmed the generality of the result (not shown). We calculated the frequencies of occurrence in percentage for each month during 2000–2014, and converted these to an average climatological seasonal cycle ~~with the year-to-year variation shown as standard deviation ( $\pm$ sigma)~~ (Fig. 11). Standard deviations in a month represents the variability in the SOP frequency among different years during 2000–2014 period.

The highest frequency of SOPs over the central Himalayas is found during the pre-monsoon season (MAM), followed by winter (DJF). The frequency of SOP occurrences over Nainital increases steadily from January (2.7%) to May (10.8%), and abruptly declines in June (1.2%). The model does not predict any SOPs during July–October. It should be noted that here we included only those events as SOPs, which show enhancements by at least 50%, therefore some events with smaller enhancements could be present during July–October. It is suggested that the more frequent stratospheric intrusions during spring, combined with the stronger horizontal advection, lead to more frequent SOP events. Seasonal composites of the spatial locations of folds (Fig. S6) shows higher frequency of

occurrence during SOPs. The effects of stronger cross-tropopause exchange and influx of the stratospheric air masses during spring and winter over the Himalayas and surrounding regions, such as southern parts of the Tibetan Plateau, have also been shown by Škerlak et al. (2014, 2015). The frequency of SOP events over this region is minimum during the summer monsoon season, as the weak horizontal winds (Ojha et al., 2014; Naja et al., 2016) do not transport the ozone from STTs over large distances. The frequency of stratospheric intrusions and tropopause folds over the Himalayas and surrounding regions are lower during the summer monsoon (Cristofanelli et al., 2010; Putero et al., 2016). Multiple tropopauses that can occur in winter and spring over the Tibetan Plateau are shown to be absent during the summer monsoon season (Chen et al., 2011). Additionally, stronger vertical mixing due to monsoonal convection inhibits high ozone layers to form and sustain. These findings are in agreement with the ground-based ozone measurements in the southern Himalaya, where about 78% of the stratospheric influences were attributed to the PV structures and subtropical jet-streams induced by fluctuations of the zonal flow and tropopause fold development along the the subtropical jet-stream, while monsoon depressions only account for 3% of the events (Bracci et al., 2012). Further, the seasonality of SOP frequency derived from EMAC simulations is consistent with the conclusions based on the limited number of observational profiles in Ojha et al. (2014). Next we determine the enhancements in tropospheric ozone columns due to presence of SOPs over the central Himalayas.

### 3.4 Effect of SOPs on Tropospheric Column Ozone

Fig. 12 shows the climatological mean seasonal cycle of the Tropospheric Column Ozone (TCO) in Dobson Units (DU) over Nainital from EMAC simulations over the period 2000–2014. TCO values are calculated by integrating ozone mixing ratios up to the LRT, determined using the WMO definition. To investigate the effect of SOPs on TCO, we compare three TCO values: First using EMAC simulated  $O_3$  values from all time steps, second by selecting only the time steps when there is an SOP event as per the criteria discussed in Sec. 3.3, and third by taking all time steps when SOPs do not occur.

TCO values for All-times and No-SOPs are found to be very similar, mainly due to the large number of data counts (more than 1000 data counts in individual month), as compared to those in SOPs (0-120 data counts in individual month). The maxima of TCO during May and June ( $54.7 \pm 5.9$  and  $55.0 \pm 4.4$  DU respectively) are attributed to the intense solar radiation and high pollution loading over northern India. While photochemical production of ozone is less efficient during the winter (TCO:  $33.7 \pm 3.6$  to  $37.6 \pm 5.8$  DU) and the summer monsoon (e.g.  $44.9 \pm 4.9$  DU in August). Overall, the EMAC simulated TCO seasonality from all data is found to be consistent with satellite data (Ojha et al., 2012) over this region.

The occurrences of SOPs are seen to clearly enhance the TCO values during the winter, pre-monsoon and early summer. To estimate the enhancement in the tropospheric ozone that would



likely persist in the troposphere (not reversible), here an additional criterion of PV values upto 2 PVU has been applied.

The maximum enhancement in climatological average TCO value due to SOPs is found during January, when TCO values during SOPs ( $43.5 \pm 4.6$ – $3.0$  DU) are higher by as much as ~~9 DU~~ ~~(267.5 DU (21%))~~ compared to the non-SOP time steps ( $34.5$ – $36.0 \pm 4.6$ – $3.6$  DU). The enhancements in tropospheric ozone loading over the central Himalayas due to SOPs are estimated to be ~~4–9 DU~~ ~~(7–263.3–7.5 DU (6–21%))~~ during January to June. Additional calculations, relaxing the PV criteria to include SOP timesteps having PV values higher than 2PVU as well, shows slightly higher values of the estimated enhancement (4–9 DU: 7–26%) on the TCO.

#### 4 Conclusions

In this study, we used the EMAC model to investigate the layers of high ozone mixing ratios (SOPs) in the middle-upper troposphere, observed over the central Himalayas in northern India. EMAC successfully reproduces the occurrence, altitudinal placement and the relative ozone enhancements during SOP events observed in ozonesonde profiles. The vertical profiles calculated by ~~EMAC~~ long-term EMAC simulations show layers of high PV ( $1.8$ –~~4.7~~– $\pm 0.5$ – $3.0 \pm 1.3$  PVU) coinciding with the altitude of SOPs suggesting the influences from stratospheric intrusions. The analysis of  $O_3$ s further shows that generally all excess ozone at SOP altitudes over the Himalayas is transported from the stratosphere. ~~Photochemically produced (tropospheric) ozone is found to be significant only towards the onset of~~ Average  $O_3$ s at the SOP altitudes is estimated to be maximum during the spring ( $162.5 \pm 40$  nmol mol<sup>-1</sup>), followed by winter ( $149.4 \pm 35$  nmol mol<sup>-1</sup>). Tropospheric photochemical sources are found to contribute significantly to the SOPs and above during the summer monsoon ( $30$  nmol mol<sup>-1</sup>).

Analysis of backward air trajectories in conjunction with EMAC simulated  $O_3$  distributions and tropopause dynamics revealed that stratospheric air masses are sandwiched between tropospheric layers at 10–11 km altitude due to tropopause folds which are rapidly transported along the subtropical jet to cause SOP structures over the Himalayas. In contrast to SOP timesteps, a fraction of air mass trajectories during non SOP timesteps are from the south west, which have significantly lower contributions of stratospheric ozone. Regions as far as northern Africa and the Atlantic Ocean, the Middle-East and northern South Asia are found to be regions of stratospheric intrusions that act as sources of high-ozone mixing ratios. The distribution of  $O_3$ s showed that STT effects ~~have been confined at latitudes higher than about 25°N and are minimal over the~~ are more pronounced over the northern Indian subcontinent than those over southern India.

We used long-term model simulations (2000–2014) to calculate the frequency of SOP occurrence showing maxima during spring (about 11% of the time in May), while no SOPs were predicted during the July–October months. This is consistent with results based on ozone soundings over the

417 region. The high frequency of SOPs during spring is attributed to the occurrence of stratospheric  
418 intrusions combined with rapid horizontal transport. The minima in the frequency of SOPs during  
419 the summer monsoon are partially due to much weaker horizontal transport ~~supplemented with due~~  
420 to the northward displacement of subtropical jet stream and stronger monsoonal convective mixing.  
421 Model simulations were further used to investigate the effect of SOPs on the TCO. The EMAC sim-  
422 ulated TCO seasonality is in agreement with satellite data. SOP occurrence is found to significantly  
423 enhance the TCO over the region by ~~4–9 DU (7–26)~~3.3–7.5 DU (6–21%). Such an enhancement  
424 in tropospheric ozone at the SOP altitude could translate to an increase in surface temperature by  
425 0.06 to 0.13 degree, based on the vertical profile of ozone forcing (Lacis et al., 1990). Additionally,  
426 as expected due to their origin from dynamical processes, the occurrences of SOPs discern very  
427 large interannual variability (see e. g. Supplementary material-Fig. S9), which highlights a need  
428 of in situ measurements and numerical simulations on climatic timescales to quantify the role of  
429 SOPs in measured ozone trends over Asian regions especially in the middle-upper troposphere  
430 (Banerjee et al., 2016; Tanimoto et al., 2016), and their impacts on tropospheric chemistry and climate.  
431

432 *Acknowledgements.* The model simulations have been performed at the German Climate Computing Centre  
433 (DKRZ) through support from the Bundesministerium für Bildung und Forschung (BMBF). DKRZ and its  
434 scientific steering committee are gratefully acknowledged for providing the HPC and data archiving resources  
435 for this consortial project ESCiMo (Earth System Chemistry integrated Modelling). The authors gratefully  
436 acknowledge the NOAA Air Resources Laboratory (ARL) for the provision of the HYSPLIT transport and  
437 dispersion model and READY website (<http://www.ready.noaa.gov>) used in this publication. Constructive comments  
438 and suggestions from the two anonymous reviewers are gratefully acknowledged.

## 439 References

- 440 Akritidis, D., Pozzer, A., Zanis, P., Tyrllis, E., Škerlak, B., Sprenger, M., and Lelieveld, J.: On the role  
441 of tropopause folds in summertime tropospheric ozone over the eastern Mediterranean and the Mid-  
442 dle East, *Atmospheric Chemistry and Physics Discussions*, 2016, 1–24, doi:10.5194/acp-2016-547, [http://](http://www.atmos-chem-phys-discuss.net/acp-2016-547/)  
443 [www.atmos-chem-phys-discuss.net/acp-2016-547/](http://www.atmos-chem-phys-discuss.net/acp-2016-547/), 2016.
- 444 Banerjee, A., Maycock, A. C., Archibald, A. T., Abraham, N. L., Telford, P., Braesicke, P., and Pyle, J. A.:  
445 Drivers of changes in stratospheric and tropospheric ozone between year 2000 and 2100, *Atmospheric*  
446 *Chemistry and Physics*, 16, 2727–2746, doi:10.5194/acp-16-2727-2016, [http://www.atmos-chem-phys.net/](http://www.atmos-chem-phys.net/16/2727/2016/)  
447 [16/2727/2016/](http://www.atmos-chem-phys.net/16/2727/2016/), 2016.
- 448 Bracci, A., Cristofanelli, P., Sprenger, M., Bonafè, U., Calzolari, F., Duchi, R., Laj, P., Marinoni, A., Roccato,  
449 F., Vuillermoz, E., and Bonasoni, P.: Transport of Stratospheric Air Masses to the Nepal Climate Observa-  
450 tory–Pyramid (Himalaya; 5079 m MSL): A Synoptic-Scale Investigation, *Journal of Applied Meteorology*  
451 *and Climatology*, 51, 1489–1507, doi:10.1175/JAMC-D-11-0154.1, 2012.
- 452 Chen, X. L., Ma, Y. M., Kelder, H., Su, Z., and Yang, K.: On the behaviour of the tropopause folding events over  
453 the Tibetan Plateau, *Atmospheric Chemistry and Physics*, 11, 5113–5122, doi:10.5194/acp-11-5113-2011,  
454 <http://www.atmos-chem-phys.net/11/5113/2011/>, 2011.
- 455 Cristofanelli, P., Bracci, A., Sprenger, M., Marinoni, A., Bonafè, U., Calzolari, F., Duchi, R., Laj, P., Pi-  
456 chon, J. M., Roccato, F., Venzac, H., Vuillermoz, E., and Bonasoni, P.: Tropospheric ozone variations at  
457 the Nepal Climate Observatory-Pyramid (Himalayas, 5079 m a.s.l.) and influence of deep stratospheric in-  
458 trusion events, *Atmospheric Chemistry and Physics*, 10, 6537–6549, doi:10.5194/acp-10-6537-2010, [http://](http://www.atmos-chem-phys.net/10/6537/2010/)  
459 [www.atmos-chem-phys.net/10/6537/2010/](http://www.atmos-chem-phys.net/10/6537/2010/), 2010.
- 460 Das, S. S., Ratnam, M. V., Uma, K. N., Subrahmanyam, K. V., Girach, I. A., Patra, A. K., Aneesh, S.,  
461 Suneeth, K. V., Kumar, K. K., Kesarkar, A. P., Sijikumar, S., and Ramkumar, G.: Influence of tropical cy-  
462 clones on tropospheric ozone: possible implications, *Atmospheric Chemistry and Physics*, 16, 4837–4847,  
463 doi:10.5194/acp-16-4837-2016, <http://www.atmos-chem-phys.net/16/4837/2016/>, 2016.
- 464 Dee, D. P., Uppala, S. M., Simmons, A. J., Berrisford, P., Poli, P., Kobayashi, S., Andrae, U., Balmaseda,  
465 M. A., Balsamo, G., Bauer, P., Bechtold, P., Beljaars, A. C. M., van de Berg, L., Bidlot, J., Bormann, N.,  
466 Delsol, C., Dragani, R., Fuentes, M., Geer, A. J., Haimberger, L., Healy, S. B., Hersbach, H., Hólm, E. V.,  
467 Isaksen, I., Kållberg, P., Köhler, M., Matricardi, M., McNally, A. P., Monge-Sanz, B. M., Morcrette, J.-  
468 J., Park, B.-K., Peubey, C., de Rosnay, P., Tavolato, C., Thépaut, J.-N., and Vitart, F.: The ERA-Interim  
469 reanalysis: configuration and performance of the data assimilation system, *Quarterly Journal of the Royal*  
470 *Meteorological Society*, 137, 553–597, doi:10.1002/qj.828, <http://dx.doi.org/10.1002/qj.828>, 2011.
- 471 Dobson, G.: The laminated structure of the ozone in the atmosphere, *Quarterly Journal of the Royal Meteorol-*  
472 *ogical Society*, 99, 599–607, 1973.
- 473 Draxler, R. and Hess, G.: Description of the HYSPLIT 4 modeling system, NOAA Tech. Memo. ERL ARL-224,  
474 NOAA Air Resources Laboratory, Silver Spring, MD, p. 24 pp., 1997.
- 475 Draxler, R. and Hess, G.: An overview of the HYSPLIT 4 modeling system of trajectories, dispersion, and  
476 deposition, *Aust. Meteor. Mag.*, 47, 295–308, 1998.
- 477 Draxler, R., Stunder, B., Rolph, G., Stein, A., and Taylor, A.: HYSPLIT4 USER’s GUIDE, [http://www.arl.noaa.](http://www.arl.noaa.gov/documents/reports/hysplit_user_guide.pdf)  
478 [gov/documents/reports/hysplit\\_user\\_guide.pdf](http://www.arl.noaa.gov/documents/reports/hysplit_user_guide.pdf), 2014.

479 Ellrod, G. and Knapp, D.: An Objective Clear-Air Turbulence Forecasting Technique: Ver-  
480 ification and Operational Use, *Weather and Forecasting*, 7, 150–165, doi:10.1175/1520-  
481 0434(1992)007<0150:AOCATF>2.0.CO;2, [http://dx.doi.org/10.1175/1520-0434\(1992\)007<0150:](http://dx.doi.org/10.1175/1520-0434(1992)007<0150:AOCATF>2.0.CO;2)  
482 [AOCATF>2.0.CO;2](http://dx.doi.org/10.1175/1520-0434(1992)007<0150:AOCATF>2.0.CO;2), 1992.

483 Fadnavis, S., Chakraborty, T., and Beig, G.: Seasonal stratospheric intrusion of ozone in the upper tropo-  
484 sphere over India, *Annales Geophysicae*, 28, 2149–2159, doi:10.5194/angeo-28-2149-2010, [http://www.](http://www.ann-geophys.net/28/2149/2010/)  
485 [ann-geophys.net/28/2149/2010/](http://www.ann-geophys.net/28/2149/2010/), 2010.

486 Fishman, J., Wozniak, A. E., and Creilson, J. K.: Global distribution of tropospheric ozone from satellite mea-  
487 surements using the empirically corrected tropospheric ozone residual technique: Identification of the re-  
488 gional aspects of air pollution, *Atmospheric Chemistry and Physics*, 3, 893–907, doi:10.5194/acp-3-893-  
489 2003, <http://www.atmos-chem-phys.net/3/893/2003/>, 2003.

490 Ganguly, N. D. and Tzani, C.: Study of Stratosphere-troposphere exchange events of ozone in India and Greece  
491 using ozonesonde ascents, *Meteorological Applications*, 18, 467–474, doi:10.1002/met.241, [http://dx.doi.](http://dx.doi.org/10.1002/met.241)  
492 [org/10.1002/met.241](http://dx.doi.org/10.1002/met.241), 2011.

493 Holton, J. R. and Lelieveld, J.: Stratosphere-Troposphere Exchange and its role in the budget of tropospheric  
494 ozone, pp. 173–190, Springer Berlin Heidelberg, Berlin, Heidelberg, doi:10.1007/978-3-642-61051-6\_8,  
495 [http://dx.doi.org/10.1007/978-3-642-61051-6\\_8](http://dx.doi.org/10.1007/978-3-642-61051-6_8), 1996.

496 Hwang, S.-H., Kim, J., Won, Y.-I., Cho, H. K., Kim, J. S., Lee, D.-H., Cho, G.-R., and Oh, S. N.: Sta-  
497 tistical characteristics of secondary ozone density peak observed in Korea, *Advances in Space Research*,  
498 36, 952–957, doi:<http://dx.doi.org/10.1016/j.asr.2005.05.080>, [http://www.sciencedirect.com/science/article/](http://www.sciencedirect.com/science/article/pii/S027311770500699X)  
499 [pii/S027311770500699X](http://www.sciencedirect.com/science/article/pii/S027311770500699X), 2005.

500 Hwang, S.-H., Kim, J., and Cho, G.-R.: Observation of secondary ozone peaks near the tropopause over the Ko-  
501 rean peninsula associated with stratosphere-troposphere exchange, *Journal of Geophysical Research: Atmo-*  
502 *spheres*, 112, n/a–n/a, doi:10.1029/2006JD007978, <http://dx.doi.org/10.1029/2006JD007978>, d16305, 2007.

503 Jöckel, P., Kerkweg, A., Pozzer, A., Sander, R., Tost, H., Riede, H., Baumgaertner, A., Gromov, S., and Kern, B.:  
504 Development cycle 2 of the Modular Earth Submodel System (MESSy2), *Geoscientific Model Development*,  
505 3, 717–752, doi:10.5194/gmd-3-717-2010, <http://www.geosci-model-dev.net/3/717/2010/>, 2010.

506 Jöckel, P., Tost, H., Pozzer, A., Kunze, M., Kirner, O., Brenninkmeijer, C. A. M., Brinkop, S., Cai, D. S.,  
507 Dyroff, C., Eckstein, J., Frank, F., Garny, H., Gottschaldt, K.-D., Graf, P., Grewe, V., Kerkweg, A., Kern,  
508 B., Matthes, S., Mertens, M., Meul, S., Neumaier, M., Nützel, M., Oberländer-Hayn, S., Ruhnke, R., Runde,  
509 T., Sander, R., Scharffe, D., and Zahn, A.: Earth System Chemistry integrated Modelling (ESCiMo) with  
510 the Modular Earth Submodel System (MESSy) version 2.5.1, *Geoscientific Model Development*, 9, 1153–  
511 1200, doi:10.5194/gmd-9-1153-2016, <http://www.geosci-model-dev.net/9/1153/2016/>, 2016.

512 Kumar, A., Ram, K., and Ojha, N.: Variations in carbonaceous species at a high-altitude  
513 site in western India: Role of synoptic scale transport, *Atmospheric Environment*, pp. –,  
514 doi:<http://dx.doi.org/10.1016/j.atmosenv.2015.07.039>, [http://www.sciencedirect.com/science/article/pii/](http://www.sciencedirect.com/science/article/pii/S1352231015302387)  
515 [S1352231015302387](http://www.sciencedirect.com/science/article/pii/S1352231015302387), 2015.

516 Lacis, A. A., Wuebbles, D. J., and Logan, J. A.: Radiative forcing of climate by changes in  
517 the vertical distribution of ozone, *Journal of Geophysical Research: Atmospheres*, 95, 9971–9981,  
518 doi:10.1029/JD095iD07p09971, <http://dx.doi.org/10.1029/JD095iD07p09971>, 1990.

519 Lal, S., Venkataramani, S., Srivastava, S., Gupta, S., Mallik, C., Naja, M., Sarangi, T., Acharya, Y. B., and Liu,  
 520 X.: Transport effects on the vertical distribution of tropospheric ozone over the tropical marine regions sur-  
 521 rounding India, *Journal of Geophysical Research: Atmospheres*, 118, 1513–1524, doi:10.1002/jgrd.50180,  
 522 <http://dx.doi.org/10.1002/jgrd.50180>, 2013.

523 Lelieveld, J. and Dentener, F. J.: What controls tropospheric ozone?, *Journal of Geophysical Research: Atmo-*  
 524 *spheres*, 105, 3531–3551, doi:10.1029/1999JD901011, <http://dx.doi.org/10.1029/1999JD901011>, 2000.

525 Lemoine, R.: Secondary maxima in ozone profiles, *Atmospheric Chemistry and Physics*, 4, 1085–1096,  
 526 doi:10.5194/acp-4-1085-2004, <http://www.atmos-chem-phys.net/4/1085/2004/>, 2004.

527 Logan, J. A.: Tropospheric ozone: :Seasonal behavior, trends and antropogenic influence, *J. Geophys. Res.*, 90,  
 528 10 463–10 482, 1985.

529 Logan, J. A.: Trends in the vertical distribution of ozone: an analysis of ozonesonde data, *J. Geophys. Res.*, 99,  
 530 25 553–25 585, 1994.

531 Ma, J., Lin, W. L., Zheng, X. D., Xu, X. B., Li, Z., and Yang, L. L.: Influence of air mass downward  
 532 transport on the variability of surface ozone at Xianggelila Regional Atmosphere Background Station,  
 533 southwest China, *Atmospheric Chemistry and Physics*, 14, 5311–5325, doi:10.5194/acp-14-5311-2014,  
 534 <http://www.atmos-chem-phys.net/14/5311/2014/>, 2014.

535 Mandal, T. K., Cho, J. Y. N., Rao, P. B., Jain, A. R., Peshin, S. K., Srivastava, S. K., Bohra, A. K., and Mitra,  
 536 A. P.: Stratosphere-troposphere ozone exchange observed with the Indian MST radar and a simultaneous  
 537 balloon-borne ozonesonde, *Radio Science*, 33, 861–893, doi:10.1029/97RS03553, [http://dx.doi.org/10.1029/](http://dx.doi.org/10.1029/97RS03553)  
 538 [97RS03553](http://dx.doi.org/10.1029/97RS03553), 1998.

539 Monks, P. S., Archibald, A. T., Colette, A., Cooper, O., Coyle, M., Derwent, R., Fowler, D., Granier, C., Law,  
 540 K. S., Mills, G. E., Stevenson, D. S., Tarasova, O., Thouret, V., von Schneidemesser, E., Sommariva, R., Wild,  
 541 O., and Williams, M. L.: Tropospheric ozone and its precursors from the urban to the global scale from air  
 542 quality to short-lived climate forcer, *Atmospheric Chemistry and Physics*, 15, 8889–8973, doi:10.5194/acp-  
 543 15-8889-2015, <http://www.atmos-chem-phys.net/15/8889/2015/>, 2015.

544 Myhre, G., Shindell, D., Breon, F.-M., Collins, W., Fuglestedt, J., Huang, J., Koch, D., Lamarque, J.-F.,  
 545 Lee, D., Mendoza, B., Nakajima, T., Robock, A., Stephens, G., Takemura, T., and Zhang, H.: Anthro-  
 546 pogenic and Natural Radiative Forcing. In: *Climate Change 2013: The Physical Science Basis. Contri-*  
 547 *bution of Working Group I to the Fifth Assessment Report of the Intergovernmental Panel on Climate*  
 548 *Change* [Stocker, T.F., D. Qin, G.-K. Plattner, M. Tignor, S.K. Allen, J. Boschung, A. Nauels, Y. Xia, V.  
 549 Bex and P.M. Midgley (eds.)], Cambridge University Press, [https://www.ipcc.ch/pdf/assessment-report/ar5/](https://www.ipcc.ch/pdf/assessment-report/ar5/wg1/WG1AR5_Chapter08_FINAL.pdf)  
 550 [wg1/WG1AR5\\_Chapter08\\_FINAL.pdf](https://www.ipcc.ch/pdf/assessment-report/ar5/wg1/WG1AR5_Chapter08_FINAL.pdf), 2013.

551 Naja, M., Bhardwaj, P., Singh, N., Kumar, P., Kumar, R., Ojha, N., Sagar, R., Satheesh, S. K., Krishna Moorthy,  
 552 K., and Kotamarthi, V. R.: High-frequency vertical profiling of meteorological parameters using AMF1 facil-  
 553 ity during RAWEX-GVAX at ARIES, Nainital, *Curr. Sci.*, 110, 2317–2325, doi:10.18520/cs/v110/i12/2317-  
 554 2325, 2016.

555 Neu, J. L., Flury, T., Manney, G. L., Santee, M. L., Livesey, N. J., and Worden, J.: Tropospheric ozone  
 556 variations governed by changes in stratospheric circulation, *NATURE GEOSCIENCE*, 7, 340–344,  
 557 doi:10.1038/NGEO2138, 2014.

558 Ojha, N., Naja, M., Singh, K. P., Sarangi, T., Kumar, R., Lal, S., Lawrence, M. G., Butler, T. M., and  
559 Chandola, H. C.: Variabilities in ozone at a semi-urban site in the Indo-Gangetic Plain region: Associa-  
560 tion with the meteorology and regional processes, *Journal of Geophysical Research: Atmospheres*, 117,  
561 doi:10.1029/2012JD017716, <http://dx.doi.org/10.1029/2012JD017716>, 2012.

562 Ojha, N., Naja, M., Sarangi, T., Kumar, R., Bhardwaj, P., Lal, S., Venkataramani, S., Sagar, R., Ku-  
563 mar, A., and Chandola, H.: On the processes influencing the vertical distribution of ozone over  
564 the central Himalayas: Analysis of yearlong ozonesonde observations, *Atmospheric Environment*,  
565 88, 201–211, doi:<http://dx.doi.org/10.1016/j.atmosenv.2014.01.031>, [http://www.sciencedirect.com/science/](http://www.sciencedirect.com/science/article/pii/S1352231014000491)  
566 [article/pii/S1352231014000491](http://www.sciencedirect.com/science/article/pii/S1352231014000491), 2014.

567 Ojha, N., Pozzer, A., Rauthe-Schöch, A., Baker, A. K., Yoon, J., Brenninkmeijer, C. A. M., and Lelieveld,  
568 J.: Ozone and carbon monoxide over India during the summer monsoon: regional emissions and trans-  
569 port, *Atmospheric Chemistry and Physics*, 16, 3013–3032, doi:10.5194/acp-16-3013-2016, [http://www.](http://www.atmos-chem-phys.net/16/3013/2016/)  
570 [atmos-chem-phys.net/16/3013/2016/](http://www.atmos-chem-phys.net/16/3013/2016/), 2016.

571 Park, S. S., Kim, J., Cho, H. K., Lee, H., Lee, Y., and Miyagawa, K.: Sudden increase in the total ozone density  
572 due to secondary ozone peaks and its effect on total ozone trends over Korea, *Atmospheric Environment*,  
573 47, 226 – 235, doi:<http://dx.doi.org/10.1016/j.atmosenv.2011.11.011>, [http://www.sciencedirect.com/science/](http://www.sciencedirect.com/science/article/pii/S1352231011011745)  
574 [article/pii/S1352231011011745](http://www.sciencedirect.com/science/article/pii/S1352231011011745), 2012.

575 Pozzer, A., Jöckel, P., Tost, H., Sander, R., Ganzeveld, L., Kerkweg, A., and Lelieveld, J.: Simulating organic  
576 species with the global atmospheric chemistry general circulation model ECHAM5/MESSy1: a comparison  
577 of model results with observations, *Atmospheric Chemistry and Physics*, 7, 2527–2550, doi:10.5194/acp-7-  
578 2527-2007, <http://www.atmos-chem-phys.net/7/2527/2007/>, 2007.

579 Pozzer, A., Pollmann, J., Taraborrelli, D., Jöckel, P., Helmig, D., Tans, P., Hueber, J., and Lelieveld, J.: Observed  
580 and simulated global distribution and budget of atmospheric C<sub>2</sub>–C<sub>5</sub> alkanes, *Atmospheric Chemistry and*  
581 *Physics*, 10, 4403–4422, doi:10.5194/acp-10-4403-2010, <http://www.atmos-chem-phys.net/10/4403/2010/>,  
582 2010.

583 Pozzer, A., de Meij, A., Pringle, K. J., Tost, H., Doering, U. M., van Aardenne, J., and Lelieveld, J.: Dis-  
584 tributions and regional budgets of aerosols and their precursors simulated with the EMAC chemistry-  
585 climate model, *Atmospheric Chemistry and Physics*, 12, 961–987, doi:10.5194/acp-12-961-2012, [http://](http://www.atmos-chem-phys.net/12/961/2012/)  
586 [www.atmos-chem-phys.net/12/961/2012/](http://www.atmos-chem-phys.net/12/961/2012/), 2012.

587 Putero, D., Cristofanelli, P., Sprenger, M., Škerlak, B., Tositti, L., and Bonasoni, P.: STEFLUX, a tool for in-  
588 vestigating stratospheric intrusions: application to two WMO/GAW global stations, *Atmospheric Chemistry*  
589 *and Physics Discussions*, 2016, 1–23, doi:10.5194/acp-2016-514, [http://www.atmos-chem-phys-discuss.net/](http://www.atmos-chem-phys-discuss.net/acp-2016-514/)  
590 [acp-2016-514/](http://www.atmos-chem-phys-discuss.net/acp-2016-514/), 2016.

591 Ramanathan, V., Ramana, M. V., Roberts, G., Kim, D., Corrigan, C., Chung, C., and Winker, D.: Warming  
592 trends in Asia amplified by brown cloud solar absorption, *Nature*, 448, doi:10.1038/nature06019, [http://dx.](http://dx.doi.org/10.1038/nature06019)  
593 [doi.org/10.1038/nature06019](http://dx.doi.org/10.1038/nature06019), 2007.

594 Ramanathan, V., Agrawal, M., Akimoto, H., Aufhammer, M., Devotta, S., Emberson, L., Hasnain, S. I., Iyn-  
595 gararasan, M., Jayaraman, A., Lawrance, M., Nakajima, T., Oki, T., Rodhe, H., Ruchirawat, M., Tan, S. K.,  
596 Vincent, J., Y., W. J., Yang, D., Zhang, Y. H., Autrup, H., Barregard, L., Bonasoni, P., Brauer, M., Brunekreef,  
597 B., Carmichael, G., Chung, C. E., Dahe, J., Feng, Y., Fuzzi, S., Gordon, T., Gosain, A. K., Htun, N., Kim, J.,

598 Mourato, S., Naeher, L., Navasumrit, P., Ostro, B., Panwar, T., Rahman, M. R., Ramana, M. V., Rupakheti,  
 599 M., Settachan, D., Singh, A. K., Helen, G. S., Tan, P. V., Viet, P. H., Yinlong, J., Yoon, S. C., Chang, W.-C.,  
 600 Wang, X., Zelikoff, J., and Zhu, A.: Atmospheric Brown Clouds: Regional Assessment Report with Focus  
 601 on Asia, United Nations Environment Programme, Nairobi, Kenya., 2008.

602 Reid, S. J. and Vaughan, G.: Lamination in ozone profiles in the lower stratosphere, *Quarterly Journal of the*  
 603 *Royal Meteorological Society*, 117, 825–844, 1991.

604 Roeckner, E., Brokopf, R., Esch, M., Giorgetta, M., Hagemann, S., Kornblueh, L., Manzini, E., Schlese, U., and  
 605 Schulzweida, U.: Sensitivity of Simulated Climate to Horizontal and Vertical Resolution in the ECHAM5  
 606 Atmosphere Model, *Journal of Climate*, 19, 3771–3791, doi:10.1175/JCLI3824.1, <http://dx.doi.org/10.1175/JCLI3824.1>, 2006.

608 Roelofs, G.-J. and Lelieveld, J.: Model study of the influence of cross-tropopause O<sub>3</sub> transports on tropo-  
 609 spheric O<sub>3</sub> levels, *Tellus B*, 49, 38–55, doi:10.1034/j.1600-0889.49.issue1.3.x, [http://dx.doi.org/10.1034/j.](http://dx.doi.org/10.1034/j.1600-0889.49.issue1.3.x)  
 610 [1600-0889.49.issue1.3.x](http://dx.doi.org/10.1034/j.1600-0889.49.issue1.3.x), 1997.

611 Sarangi, T., Naja, M., Ojha, N., Kumar, R., Lal, S., Venkataramani, S., Kumar, A., Sagar, R., and Chan-  
 612 dola, H. C.: First simultaneous measurements of ozone, CO, and NO<sub>y</sub> at a high-altitude regional repre-  
 613 sentative site in the central Himalayas, *Journal of Geophysical Research: Atmospheres*, 119, 1592–1611,  
 614 doi:10.1002/2013JD020631, <http://dx.doi.org/10.1002/2013JD020631>, 2014.

615 Shindell, D., Kuylensstierna, J. C. I., Vignati, E., van Dingenen, R., Amann, M., Klimont, Z., Anenberg, S. C.,  
 616 Muller, N., Janssens-Maenhout, G., Raes, F., Schwartz, J., Faluvegi, G., Pozzoli, L., Kupiainen, K., Höglund-  
 617 Isaksson, L., Emberson, L., Streets, D., Ramanathan, V., Hicks, K., Oanh, N. T. K., Milly, G., Williams, M.,  
 618 Demkine, V., and Fowler, D.: Simultaneously Mitigating Near-Term Climate Change and Improving Human  
 619 Health and Food Security, *Science*, 335, 183–189, doi:10.1126/science.1210026, [http://science.sciencemag.](http://science.sciencemag.org/content/335/6065/183)  
 620 [org/content/335/6065/183](http://science.sciencemag.org/content/335/6065/183), 2012.

621 Singh, N., Solanki, R., Ojha, N., Janssen, R. H. H., Pozzer, A., and Dhaka, S. K.: Boundary layer evolu-  
 622 tion over the central Himalayas from Radio Wind Profiler and Model Simulations, *Atmospheric Chemistry*  
 623 *and Physics Discussions*, 2016, 1–33, doi:10.5194/acp-2016-101, [http://www.atmos-chem-phys-discuss.net/](http://www.atmos-chem-phys-discuss.net/acp-2016-101/)  
 624 [acp-2016-101/](http://www.atmos-chem-phys-discuss.net/acp-2016-101/), 2016.

625 Sinha, P., Sahu, L., Manchanda, R., Sheel, V., Deushi, M., Kajino, M., Schultz, M., Nagendra, N., Kumar, P.,  
 626 Trivedi, D., Koli, S., Peshin, S., Swamy, Y., Tzanis, C., and Sreenivasan, S.: Transport of tropospheric and  
 627 stratospheric ozone over India: Balloon-borne observations and modeling analysis, *Atmospheric Environ-*  
 628 *ment*, 131, 228 – 242, doi:<http://dx.doi.org/10.1016/j.atmosenv.2016.02.001>, [http://www.sciencedirect.com/](http://www.sciencedirect.com/science/article/pii/S1352231016300905)  
 629 [science/article/pii/S1352231016300905](http://www.sciencedirect.com/science/article/pii/S1352231016300905), 2016.

630 Škerlak, B., Sprenger, M., and Wernli, H.: A global climatology of stratosphere-troposphere exchange us-  
 631 ing the ERA-Interim data set from 1979 to 2011, *Atmospheric Chemistry and Physics*, 14, 913–937,  
 632 doi:10.5194/acp-14-913-2014, <http://www.atmos-chem-phys.net/14/913/2014/>, 2014.

633 Škerlak, B., Sprenger, M., Pfahl, S., Tyrlis, E., and Wernli, H.: Tropopause folds in ERA-Interim: Global clima-  
 634 tology and relation to extreme weather events, *Journal of Geophysical Research: Atmospheres*, 120, 4860–  
 635 4877, doi:10.1002/2014JD022787, <http://dx.doi.org/10.1002/2014JD022787>, 2014JD022787, 2015.

636 Smit, H. G. J., Straeter, W., Johnson, B. J., Oltmans, S. J., Davies, J., Tarasick, D. W., Hoegger, B., Stubi, R.,  
 637 Schmidlin, F. J., Northam, T., Thompson, A. M., Witte, J. C., Boyd, I., and Posny, F.: Assessment of the



638 performance of ECC-ozonesondes under quasi-flight conditions in the environmental simulation chamber:  
 639 Insights from the Juelich Ozone Sonde Intercomparison Experiment (JOSIE), *Journal of Geophysical Re-*  
 640 *search: Atmospheres*, 112, n/a–n/a, doi:10.1029/2006JD007308, <http://dx.doi.org/10.1029/2006JD007308>,  
 641 d19306, 2007.

642 Sprenger, M., Croci Maspoli, M., and Wernli, H.: Tropopause folds and cross-tropopause exchange: A global  
 643 investigation based upon ECMWF analyses for the time period March 2000 to February 2001, *Journal of*  
 644 *Geophysical Research: Atmospheres*, 108, n/a–n/a, doi:10.1029/2002JD002587, [http://dx.doi.org/10.1029/](http://dx.doi.org/10.1029/2002JD002587)  
 645 2002JD002587, 8518, 2003.

646 Tanimoto, H., Zbinden, R., Thouret, V., and Nédélec, P.: Consistency of tropospheric ozone observations made  
 647 by different platforms and techniques in the global databases, *Tellus B*, 67, [http://www.tellusb.net/index.php/](http://www.tellusb.net/index.php/tellusb/article/view/27073)  
 648 tellusb/article/view/27073, 2015.

649 Tanimoto, H., Ikeda, K., Okamoto, S., Thouret, V., Emmons, L., Tilmes, S., and Lamarque, J.-F.: Recent changes  
 650 in the free tropospheric ozone over East Asian Pacific rim, International Global Atmospheric Chemistry  
 651 (IGAC) Science Conference, 26-30 September 2016, Breckenridge, CO, USA, [http://www.igac2016.org/](http://www.igac2016.org/IGAC2016_Abstracts/5.099_TANIMOTO.pdf)  
 652 IGAC2016\_Abstracts/5.099\_TANIMOTO.pdf, 2016.

653 Traub, M. and Lelieveld, J.: Cross-tropopause transport over the eastern Mediterranean, *Journal of Geo-*  
 654 *physical Research: Atmospheres*, 108, n/a–n/a, doi:10.1029/2003JD003754, [http://dx.doi.org/10.1029/](http://dx.doi.org/10.1029/2003JD003754)  
 655 2003JD003754, 4712, 2003.

656 Trickl, T., Bärtsch-Ritter, N., Eisele, H., Furger, M., Mücke, R., Sprenger, M., and Stohl, A.: High-ozone layers  
 657 in the middle and upper troposphere above Central Europe: potential import from the stratosphere along the  
 658 subtropical jet stream, *Atmospheric Chemistry and Physics*, 11, 9343–9366, doi:10.5194/acp-11-9343-2011,  
 659 <http://www.atmos-chem-phys.net/11/9343/2011/>, 2011.

660 Tyrllis, E., Škerlak, B., Sprenger, M., Wernli, H., Zittis, G., and Lelieveld, J.: On the linkage between the Asian  
 661 summer monsoon and tropopause fold activity over the eastern Mediterranean and the Middle East, *Journal*  
 662 *of Geophysical Research: Atmospheres*, 119, 3202–3221, doi:10.1002/2013JD021113, [http://dx.doi.org/10.](http://dx.doi.org/10.1002/2013JD021113)  
 663 1002/2013JD021113, 2014.

664 Varotsos, C., Kalabokas, P., and Chronopoulos, G.: Association of the Laminated Vertical Ozone Structure with  
 665 the Lower-Stratospheric Circulation, *Journal of Applied Meteorology*, 33, 473–476, 1994.

666 Venkat Ratnam, M., Ravindra Babu, S., Das, S. S., Basha, G., Krishnamurthy, B. V., and Venkateswararao, B.:  
 667 Effect of tropical cyclones on the stratosphere-troposphere exchange observed using satellite observations  
 668 over the north Indian Ocean, *Atmospheric Chemistry and Physics*, 16, 8581–8591, doi:10.5194/acp-16-8581-  
 669 2016, <http://www.atmos-chem-phys.net/16/8581/2016/>, 2016.

**Table 1.** A comparison of average ozone mixing ratios between ozonesondes and EMAC model for the lower, middle and upper troposphere during the six SOP events over Nainital

| Date     | 2–7 km    |           | 7–12 km    |            | 12–17 km   |            |
|----------|-----------|-----------|------------|------------|------------|------------|
|          | Sonde     | EMAC      | Sonde      | EMAC       | Sonde      | EMAC       |
| 20110211 | 50.7±4.1  | 69.5±3.6  | 85.8±52.1  | 112.3±52.3 | 135.9±22.9 | 173.7±42.6 |
| 20110310 | 67.6±8.1  | 86.8±1.8  | 120.5±52.0 | 134.8±39.0 | 131.9±57.4 | 184.7±76.9 |
| 20110420 | 85.8±7.7  | 96.9±7.0  | 147.1±37.3 | 136.8±28.6 | 151.4±41.6 | 151.0±36.7 |
| 20110509 | 83.0±13.3 | 101.6±5.3 | 104.8±34.7 | 154.8±25.3 | 132.9±15.4 | 140.7±17.7 |
| 20110607 | 83.1±7.6  | 107.0±6.1 | 132.4±30.2 | 110.2±10.0 | 119.8±21.6 | 111.9±35.2 |
| 20111025 | 57.1±3.3  | 72.3±1.7  | 84.4±26.8  | 86.7±17.2  | 123.3±37.6 | 130.4±31.7 |

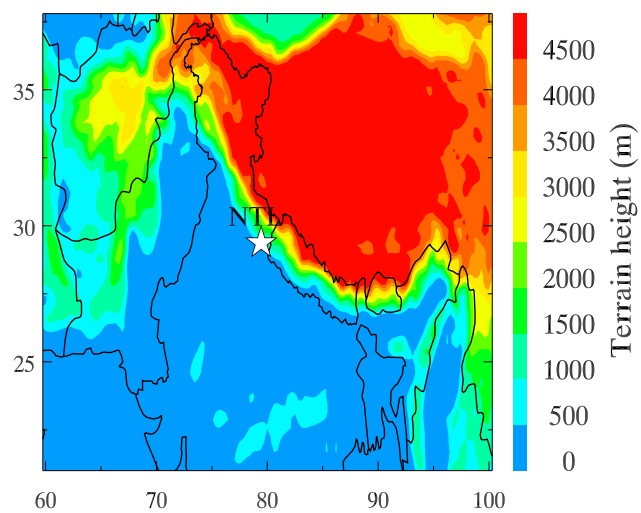

**Figure 1.** (a) A typical Secondary Ozone Peak (SOP) in an ozonesonde profile measured at 10–11 km altitude on 10<sup>th</sup> March 2011 over Nainital (Ojha et al., 2014). (b) Location of Nainital site in the central Himalayas shown in the topography map of the northern Indian region.

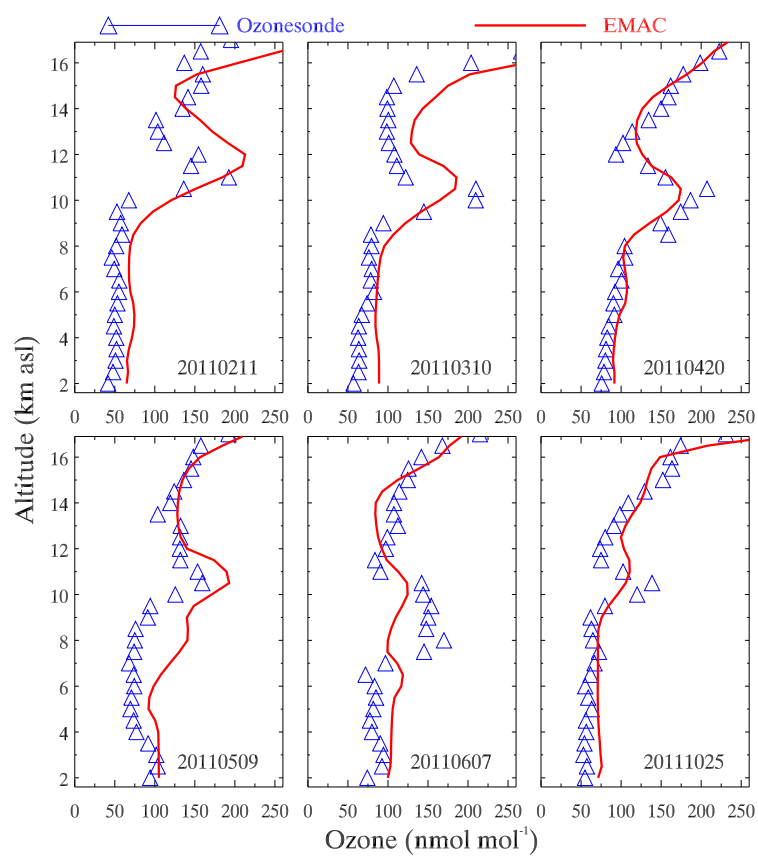

**Figure 2.** Comparison of EMAC simulated ozone profiles during the days of SOP events with ozonesonde observations over Nainital.

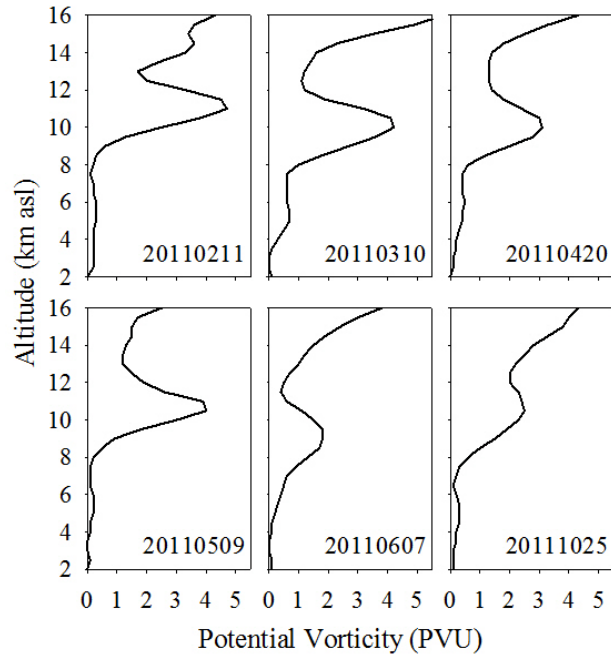

**Figure 3.** Vertical profiles of potential vorticity (PV) from EMAC simulations during the SOPs over Nainital.

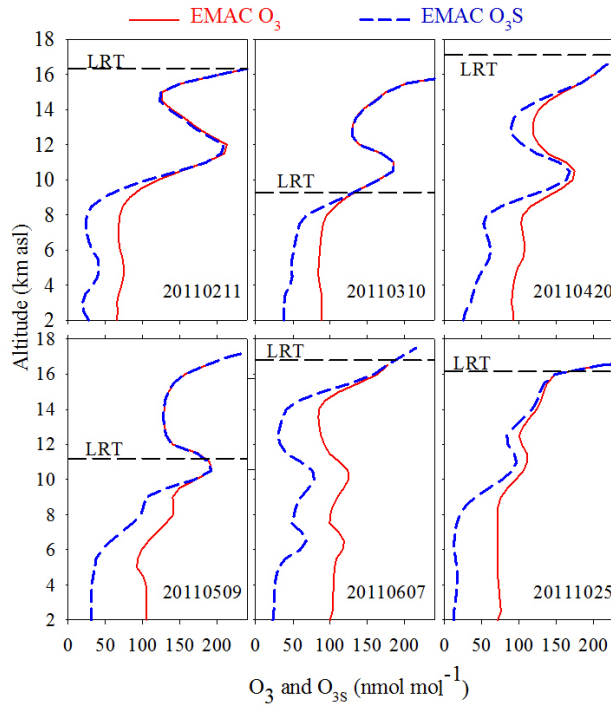

**Figure 4.** Vertical profiles of EMAC simulated ozone and stratospheric ozone tracer ( $O_{3s}$ ) during the SOPs over Nainital. The height of the Lapse Rate Tropopause (LRT) from EMAC, calculated using the WMO definition, is also shown.

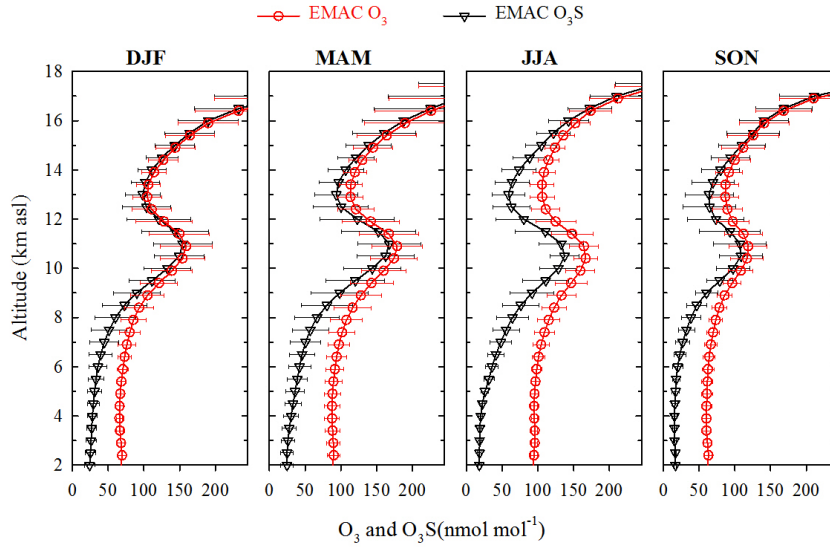

**Figure 5.** Backward air trajectories over Nainital for all events, with starting altitude of 10, 11 and 12 km. The difference between symbols on trajectories represent a time period of 1 day. The locations of tropopause folds 5 days prior to stratospheric ozone tracer ( $O_3S$ ) during the event obtained from EMAC simulations are also shown. The location of SOPs over Nainital site is shown by the star symbol. Small green circles represent shallow tropopause folds and bigger green circles aggregated into four seasons: DJF (such as on 11<sup>th</sup> Feb Winter) represent medium tropopause folds, MAM (see Sec. 3.2 for details Spring/ pre-monsoon), JJA (summer monsoon), and SON (autumn) for the period 2000–2014.

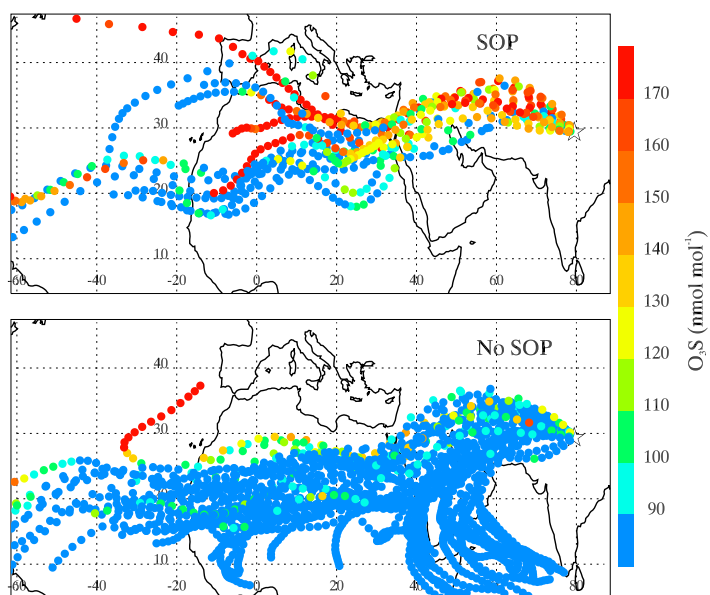

**Figure 6.** EMAC simulated evolution of  $O_3$ s along 5-day backward air trajectories over Nainital during SOPs and No SOPs with starting altitude of 11 km for the month May 2002. The difference between symbols on trajectories represent a time period of 3h. The location of the Nainital site is shown by the star symbol.



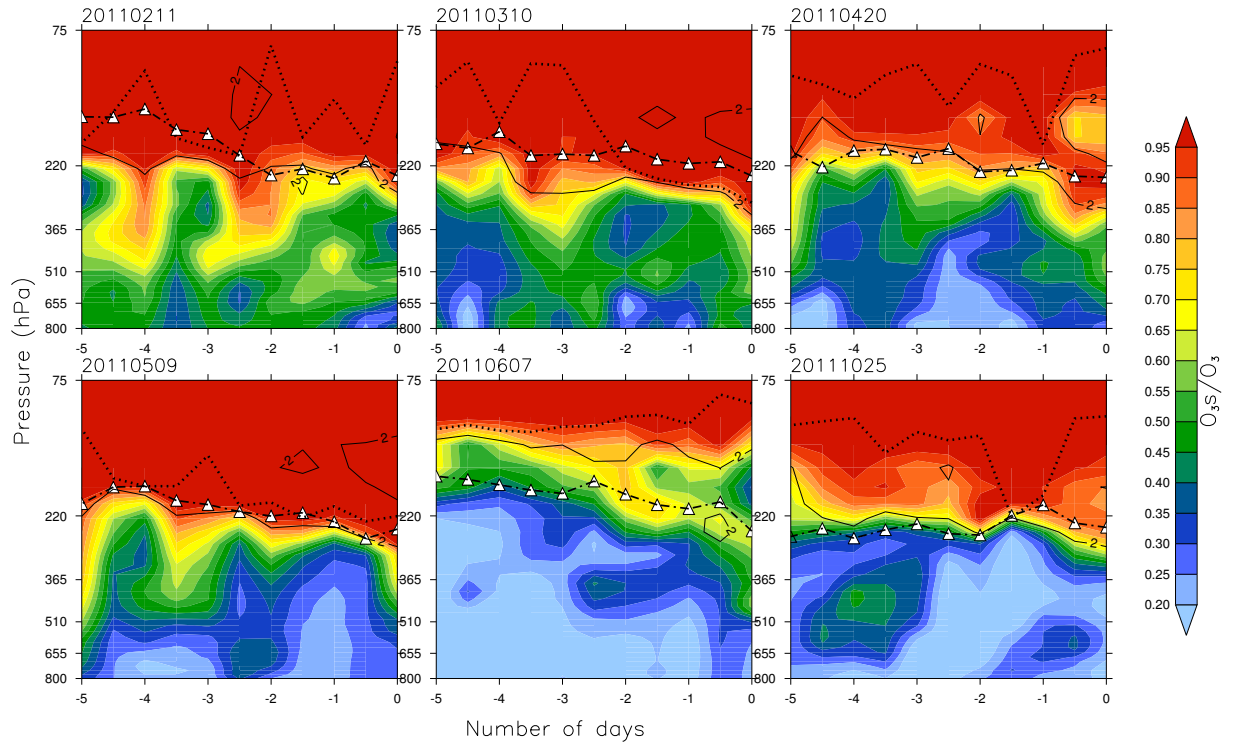

**Figure 7.** The vertical distribution of EMAC simulated  $O_3/O_{3s}$  ratio along the trajectories with starting altitude of 11km over Nainital. The X axis shows the number of days ~~back~~backward in time and the Y axis shows the pressure in hPa. ~~The~~White filled triangles show the pressure along the back-trajectory and the difference between two ~~black circles here represents~~consecutive symbols on the line represent a time period of 12 h. The ~~white~~dotted black line indicates the tropopause (LRT). The solid black line is the 2PVU contour.

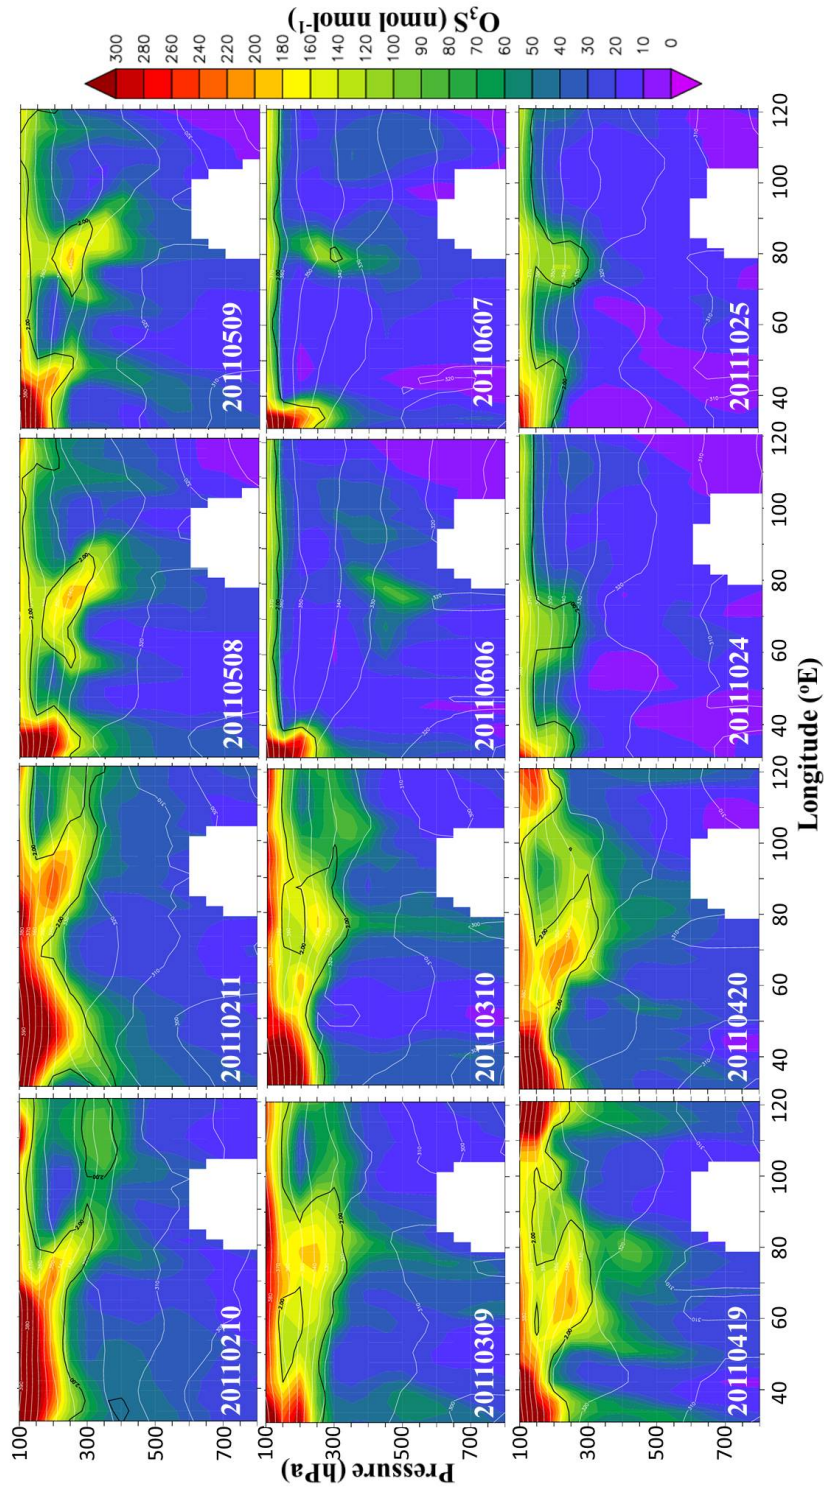

**Figure 8.** The longitude-pressure cross section of EMAC simulated  $O_3S$  at  $29.5^\circ N$  during all SOP days and a day before the event. White lines denote the potential temperature (K) and the black line denotes the dynamical tropopause at 2 PVU.

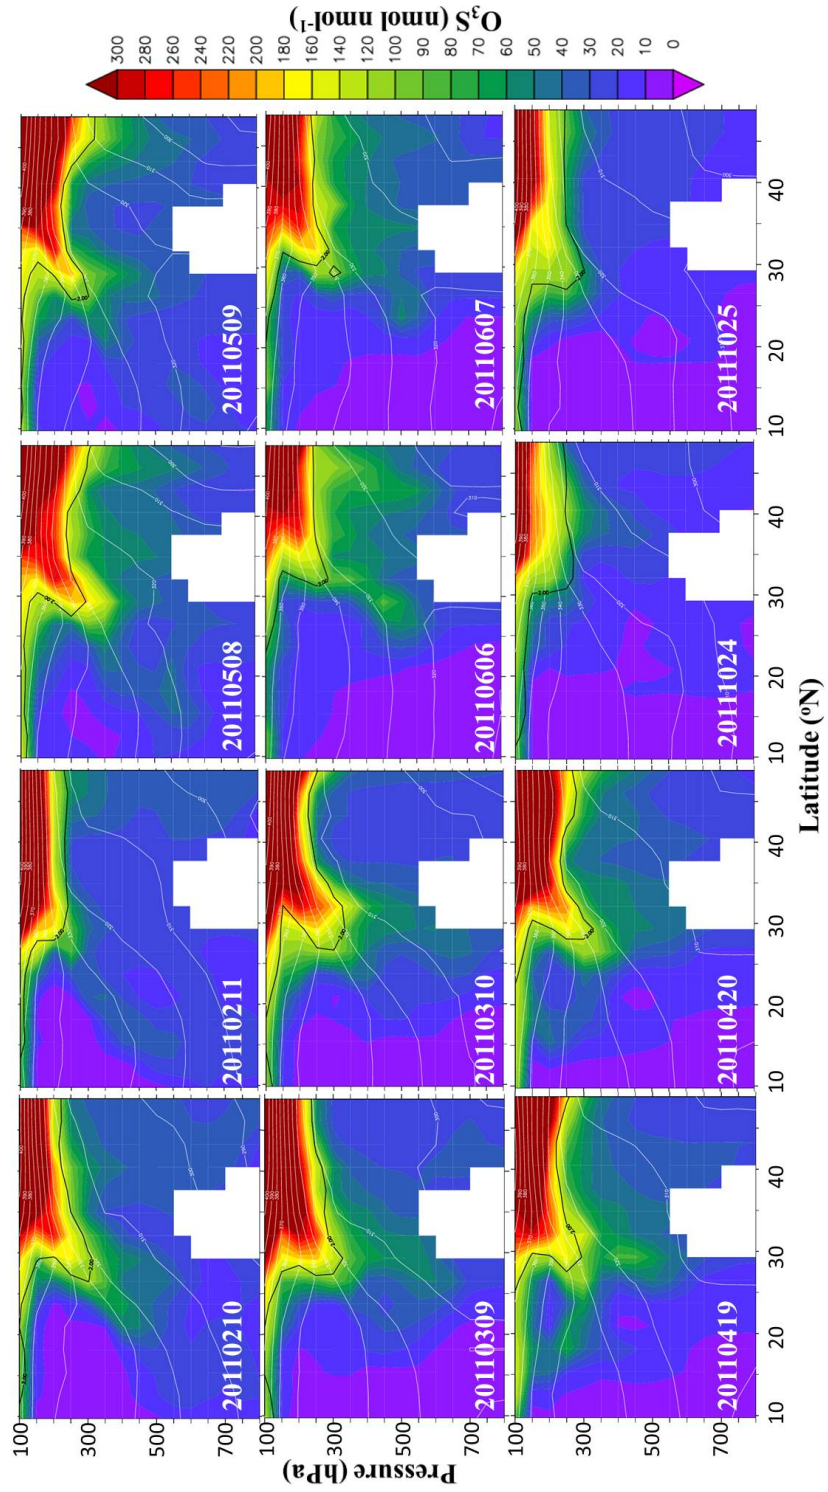

**Figure 9.** The latitude-pressure cross section of EMAC simulated  $O_3s$  at [79.5°E](#) during all SOP days and a day before the event. White lines denote the potential temperature (K) and the black line denotes the dynamical tropopause at 2 PVU.



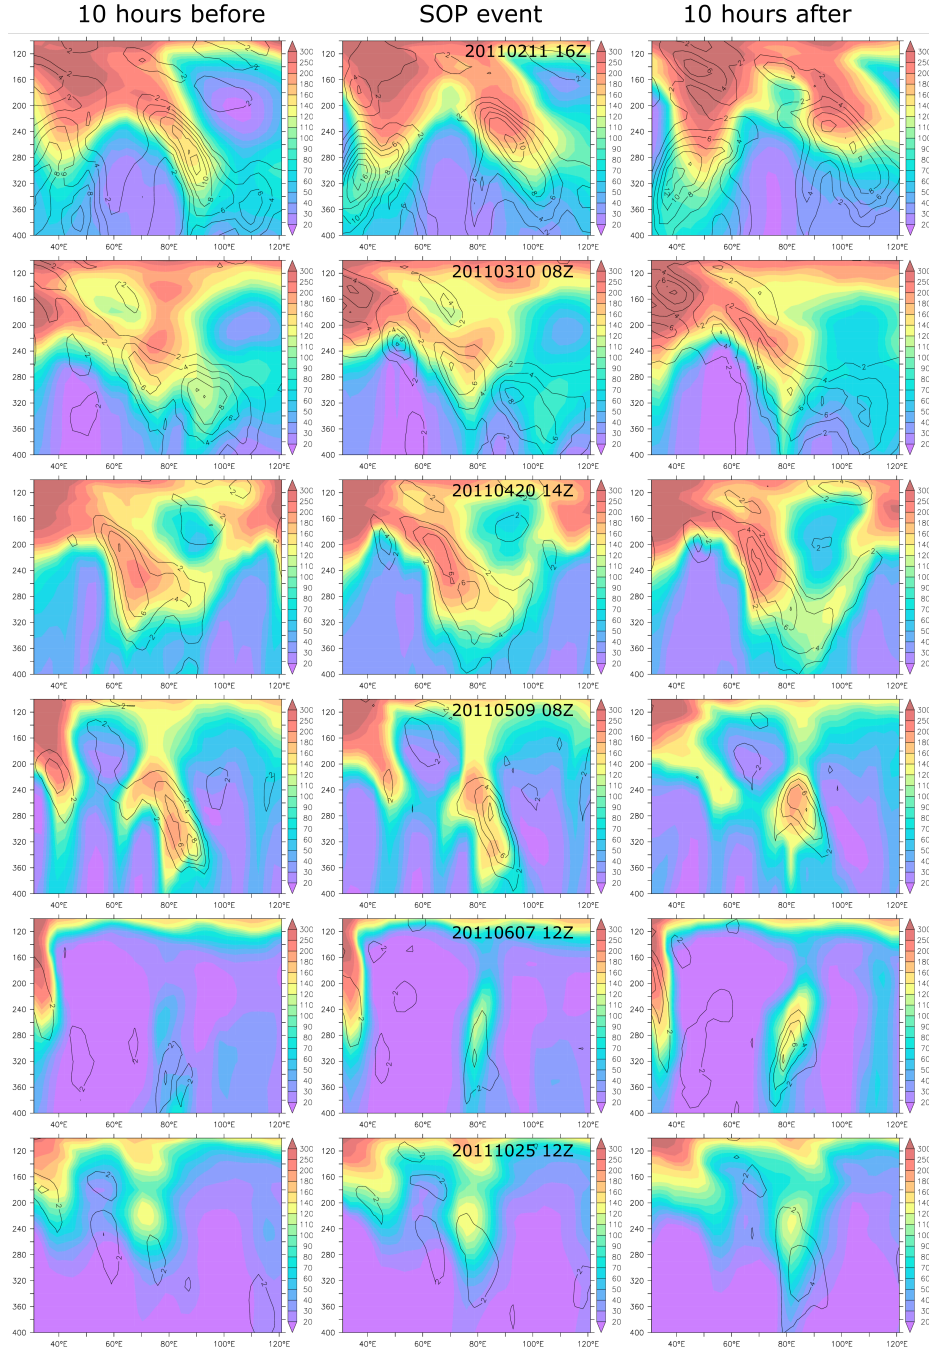

**Figure 10.** The longitude-pressure cross section of O<sub>3</sub>S (color filled), and Turbulence Index (TI) (contour lines) (in 10<sup>-7</sup>s<sup>-2</sup>) at 29.5°N.

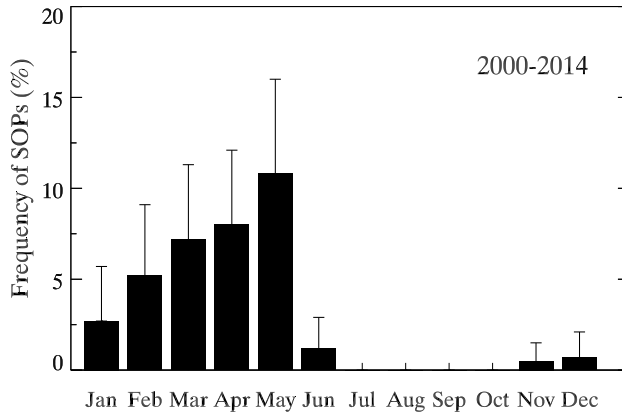

**Figure 11.** Annual cycle of ~~SOPs~~SOP occurrence frequency (%) over Nainital, calculated from the EMAC simulations for the period 2000–2014. The error bars show the standard deviation of SOP frequency during each month among different years 2000-2014 period.

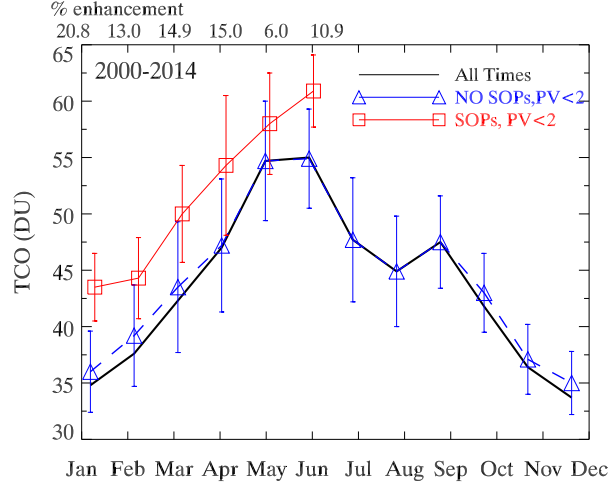

**Figure 12.** Annual cycle of EMAC simulated TCO over the central Himalayas calculated from 1) all EMAC time steps (All Times), 2) only the time steps having SOPs (SOPs), and 3) only when SOPs are not present (No SOPs) over the period 2000–2014. Enhancements in TCO values (in %) during SOPs as compared to No SOPs are also indicated. TCO values for SOPs and No SOPs are derived only when the average PV value at 10–12 km is up to 2PVU. Error bars represent the standard deviation derived from the temporal variations over the period of 2000-2014.
